# Supplementary material for: Miniaturization of a micro-optics array for highly sensitive and parallel detection on an injection moulded lab-on-a-chip
Source: Royal Society of Chemistry journal article supplement (doi:10.1039/c5lc00176e), 2015-01-01
Supplement: c5lc00176e1.pdf [file c5lc00176e1.pdf]

## Supporting information

### Miniaturization of a micro-optics array for highly sensitivity and multiplexed detection on injection moulded lab-on-a-chip

Tran Quang Hung<sup>a,b</sup>, Yi Sun<sup>a</sup>, Carl Esben Poulsen<sup>a</sup>, Than Linh-Quyen<sup>b</sup>, WaiHoe Chin<sup>b</sup>, Dang Duong Bang<sup>b</sup> and Anders Wolff<sup>a,\*</sup>

<sup>a</sup> DTU Nanotech, Department of Micro- and Nanotechnology, Technical University of Denmark, Ørsted Plads, DK-2800 Kgs. Lyngby, Denmark.

<sup>b</sup> Laboratory of Applied Micro and Nanotechnology (LAMINATE) National Food Institute, Technical University of Denmark (DTU-Food), Denmark.

#### [S1]: Distribution of the light of the fluorophores on the interface of two different refractive indices environments

J. Enderlein *et. al.*, derived equations for the emission of fluorescent light from fluorescent molecule on a surface, with the assumption that the fluorescent molecule emits into lower refractive index environment  $n_1$  by two terms of reflection and scattering, whereas, the light emitted into higher refractive environment  $n_2$  by only the refraction term. The total emission light into  $n_1$  and  $n_2$  are described as the term  $S_1$  and  $S_2$  as the following equations<sup>1</sup>:

$$S_1 = C_1 n_1 \left| \frac{k_1^3}{2\pi\epsilon_1} \right|^2 \iint \left\{ \left| \left[ \hat{\kappa}'_{p1} + R_p \exp(2i\omega_1 z_0) \hat{\kappa}_s \right] \cdot p \right|^2 + \left| \left[ 1 + R_s \exp(2i\omega_1 z_0) \right] \cdot (\hat{\kappa}_s \cdot p) \right|^2 \right\} d\Omega^2 \quad (1)$$

$$S_2 = C_2 n_2 \left| \frac{k_1^2 k_2 \omega_2}{2\pi\epsilon_1 \omega_1} \right| \iint \left\{ T_p \hat{\kappa}_{p1} \cdot p \right| 2 + \left| T_s \hat{\kappa}_s \cdot p \right| \left. \right\} \times \exp[-2 \operatorname{Im}(\omega_1) z_0] d\Omega^2 \quad (2)$$

Here  $C_{1,2} = \frac{\pi c}{2k_{1,2}^2}$ ,  $k_{1,2} = \sqrt{\varepsilon_{1,2}} \frac{\omega}{c}$ ,  $R_p = \frac{\omega_1 \varepsilon_2 - \omega_2 \varepsilon_1}{\omega_1 \varepsilon_2 + \omega_2 \varepsilon_1}$ ,  $R_s = \frac{\omega_1 - \omega_2}{\omega_1 + \omega_2}$ ,  $T_p = \frac{2n_1 n_2 \omega_1}{\omega_1 \varepsilon_2 + \omega_2 \varepsilon_1}$ ,  $T_s = \frac{2\omega_1}{\omega_1 + \omega_2}$ .

$S_1$  and  $S_2$  can be calculated based on Equation 1 and 2 with the known parameters:  $c$  is the speed of the light ( $3 \times 10^8$  m/s);  $\varepsilon_{1,2}$ , and  $n_{1,2}$ , are the dielectric constant and refractive indices of the mediums;  $\omega_{1,2}$  are the angular frequencies of the light in the investigated mediums.

Based on these two equations, the proportion of the light in different interfaces could be calculated.

### [S2] Analysis of the roughness of the sidewall of SAF structures

Method for characterization of the roughness of the sidewall surface of SAF structures are illustrated in the Fig. 1 below:

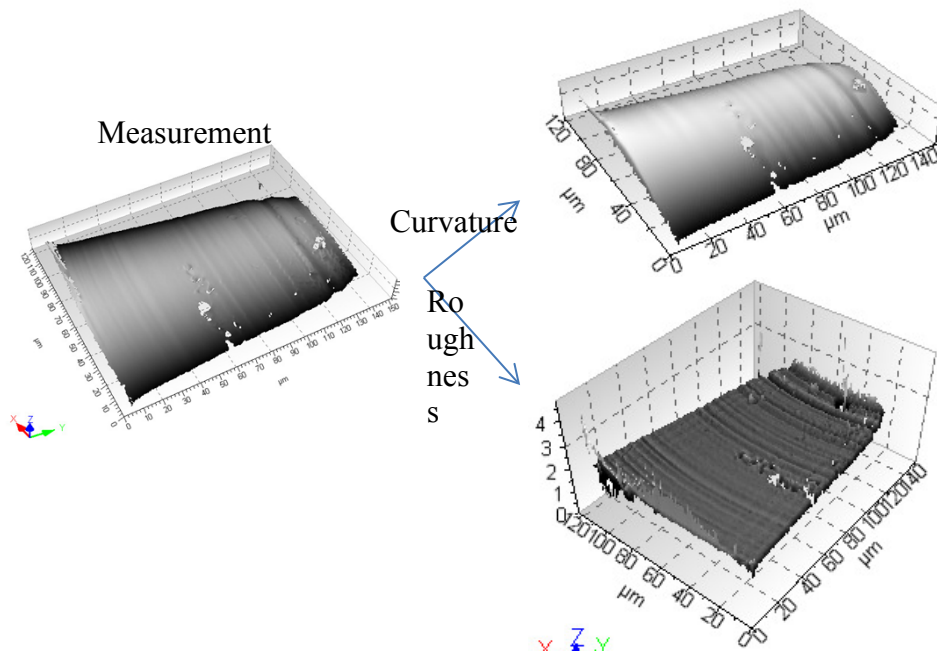

**Fig. 1** Sidewall image of a SAF structure is analysed into the curvature describing its desirable shape and the roughness.

[S3] Theoretically, the total integrated scattering (TIS) of a substrate is an exponential function of its roughness expressed by Eq. 3<sup>2</sup>:

$$\text{TIS}(R, \lambda) = R_0 \left[ 1 - e^{-\left(\frac{4\pi R \cos\theta}{\lambda}\right)^2} \right] \quad (3)$$

Here  $R$  is root means square roughness of the surface,  $R_0$  is the theoretical reflectance of the surface assigned to be 1,  $\theta$  and  $\lambda$  are the angle and wavelength of incidence light. As plot in Fig. 2, the TIS is reversely proportional to the utilized wavelength, thus using fluorophores with high emission wavelengths will reduce the TIS from the structure.

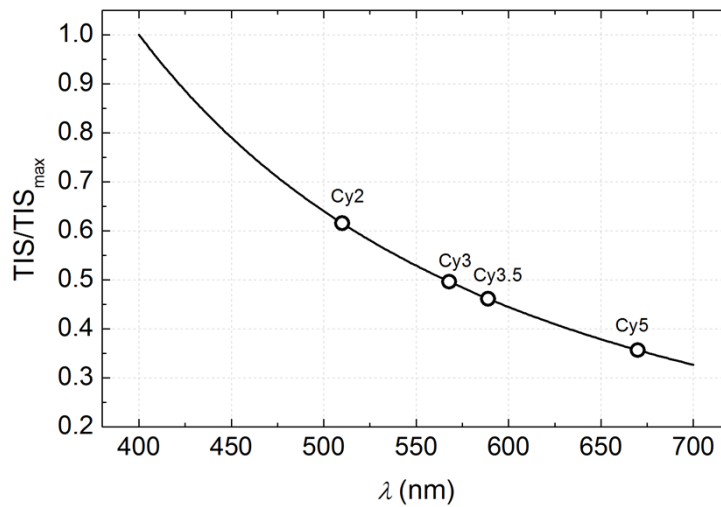

**Fig. 2** Total integrated scattering from a structure with the roughness  $R = 68$  nm vs. wavelength of the utilized light source in the visible range. The circles depict the total integrated scattering of common used fluorescent cyanine dyes.

- 1 J. Enderlein, T. Ruckstuhl and S. Seeger, *Appl. Opt.*, 1999, **38**, 724–732.
- 2 H. E. Bennett, *J. Opt. Soc. Am.*, 1963, **53**, 1389.
